# Supplementary material for: A Web-Based Mobile App (INTERACCT App) for Adolescents Undergoing Cancer and Hematopoietic Stem Cell Transplantation Aftercare to Improve the Quality of Medical Information for Clinicians: Observational Study
Source: PubMed Central journal article supplement (PMC7367529; doi:10.2196/18781), 2020-06-30
Supplement: mhealth_v8i6e18781_app4.pdf [file mhealth_v8i6e18781_app4.pdf]

Multimedia Appendix 3: Case vignette: specifics of impaired adolescent patients after cancer and HSCT

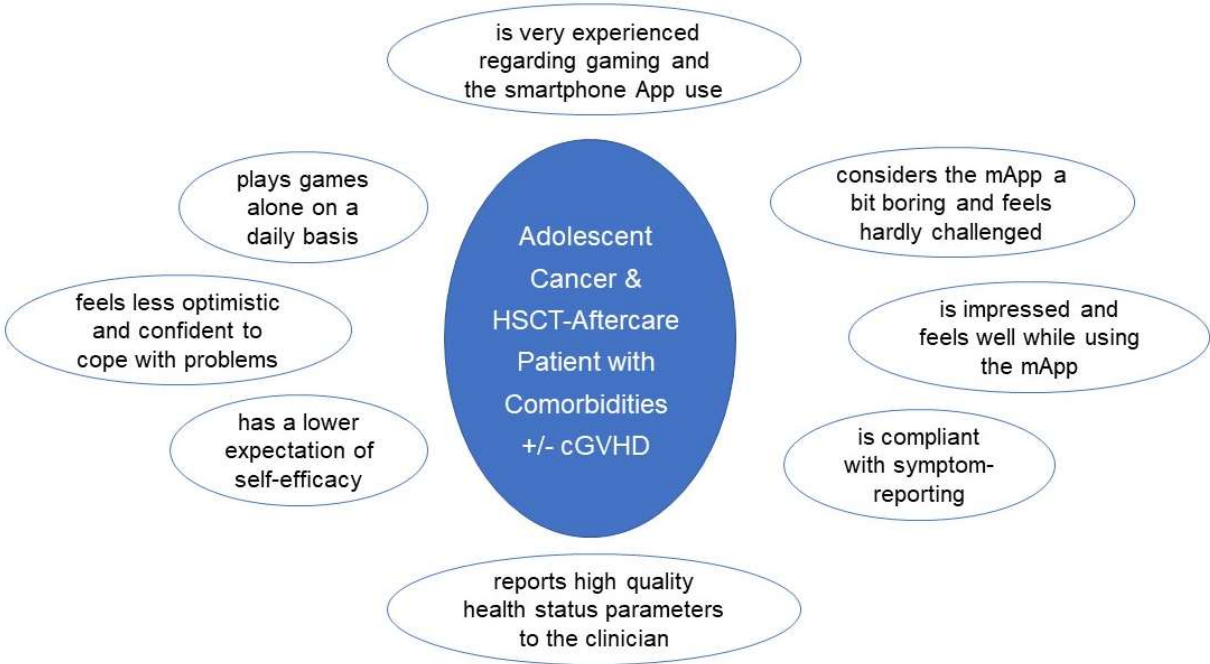

Abbreviations: cGVHD, chronic graft-versus-host-disease; HSCT, hematopoietic stem cell transplantation; mApp, mobile application.
